## Original article

### Methods for early detection of anastomotic leakage after radical gastrectomy

Sah BK, Zhang Y, Li J, Li C, Zhang H, Yan M, Zhu ZG

## Authors

\*Birendra Kumar Sah, MD/Ph D

Department of General Surgery, Gastrointestinal Surgery Unit

Ruijin Hospital Shanghai Jiao Tong University School of Medicine

Postal add: 197 Ruijin Er Road, Shanghai-200025, China

Contact no. : Ph: 0086-21-64370045 ext 671302

Email: rjsurgeon@hotmail.com

Zhang Yang (Co-first author)

Department of Radiology, Zhejiang Provincial People' Hospital, People'

Hospital of Hangzhou Medical College, Hangzhou, China

Department of Radiology, Ruijin Hospital Shanghai Jiao Tong University

School of Medicine. Shanghai, China.

Li Jian, Ph D

Clinical Research Centre

Ruijin Hospital Shanghai Jiao Tong University School of Medicine

Shanghai, China.

\*Li Chen, MD/Ph D

Department of General Surgery, Gastrointestinal Surgery Unit,

Ruijin Hospital Shanghai Jiao Tong University School of Medicine

Shanghai, China.

\*Zhang Huan

Department of Radiology

Ruijin Hospital, Shanghai Jiao Tong University, School of medicine

Shanghai, China.

Yan Min, MD

Department of General Surgery, Gastrointestinal Surgery Unit,

Ruijin Hospital Shanghai Jiao Tong University School of Medicine

Shanghai, China.

Prof. Zhu Zheng Gang, MD/Ph.D., FACS

Department of General Surgery, Gastrointestinal Surgery Unit,

Ruijin Hospital Shanghai Jiao Tong University School of Medicine

Shanghai Key Laboratory of Gastric Neoplasms

Shanghai Institute of Digestive Surgery

Shanghai, China.

\*Corresponding author

Running title: Early diagnosis of anastomotic leakage after radical gastrectomy

## Abstract

**Background:** Anastomotic leakage is a life-threatening postoperative complication after gastric cancer surgery. Previous studies have not produced effective methods for the early detection of anastomotic leakage. We investigated whether the use of postoperative computed tomography (CT) facilitates the early diagnosis of anastomotic leakage. **Methods:** Gastric cancer patients who underwent curative gastrectomy and had a CT examination after surgery were included in this study. Propensity score (PS) matching generated 70 cases (35 cases of anastomotic leakage and 35 cases of no anastomotic leak) among 210 eligible cases. Univariate and multivariate analyses were used to identify the predictive variables. **Results:** Logistic regression analysis revealed that the neutrophilia (NE  $\geq 85.8\%$ ) during postoperative day 1 to day 3 (POD 1-3), fever (body temperature (T)  $\geq 38.5^{\circ}\text{C}$ ) during postoperative day 4 to day 7 (POD 4-7), and extraluminal gas at the anastomosis site (on CT examination), were the independent predictive factors for an anastomotic leakage ( $p < 0.05$ ). **Conclusions:** On CT examination, extraluminal gas at the anastomosis site is highly suggestive of anastomotic leakage. Postoperative CT examination is beneficial for the early detection of anastomotic leakage especially in patients with neutrophilia and fever.

**Keywords:** gastric cancer; anastomotic leakage; CT; postoperative complication

## Background

Postoperative complications were quite prevalent after gastric cancer surgery, and the complication rate was almost equal between open and laparoscopic surgery [1]. However, severe complications occurred at a lower rate at high-volume centers than in low-volume centers [2]. Generally, the rate of anastomotic leakage has been reported to be below five percent, or even below two percent in the experienced centers of many Asian countries [1, 3]. Nevertheless, anastomotic leaks are still considered severe postoperative complications that aggravate the condition of compromised patients, and the mortality rate of patients with anastomotic leakages is significantly higher than that of patients without anastomotic leakages [4-6]. Several scientific reports have explored predicting the postoperative complications of gastric cancer surgery; however, most of these reports were observational studies, and many risk factors were unavoidable in general practice [7-12].

Computed tomography (CT) scans have been used to detect anastomotic leaks in patients after esophagectomy, but very few studies have reported on gastric cancer surgery, and the routine use of CT has been controversial [13-14]. No definitive suggestions exist on whether a postoperative CT or abdominal X-ray with an oral contrast agent should be routinely performed for the early detection of anastomotic leakage [15-16]. Furthermore, the interpretation of CT findings is highly subjective; for example, clinicians and radiologists are still unsure whether the presence of free gas in the abdominal

cavity or the abdominal wall is normal after gastrectomy, whether this free gas is common after laparoscopic surgeries. The main purpose of this study to investigate the objective signs of the anastomotic leakage and whether the use of postoperative computed tomography (CT) facilitates the early detection of anastomotic leakage.

## Methods

This is a retrospective study, and the primary inclusion criterion was gastric cancer patients who underwent curative gastrectomy and a CT examination after surgery. The study endpoint was the presence of postoperative complications and any complications within one month of discharge from the hospital. Altogether, 221 patients were identified, 11 patients with benign diseases were excluded. Finally, a total of 210 patients were included in the study. All patients underwent curative gastrectomies between November 2015 and August 2018.

One of the following observations was required as the standard diagnosis of an anastomotic leakage: 1. confirmation by reoperation; 2. presence of digestive content, food debris or methylene blue in the abdominal drainage tube; and 3. clear images of extraluminal contrast leak on the CT scan.

## Statistical analysis

The Statistical Package for Social Science (SPSS) version 22.0 for Windows (SPSS, Inc., Chicago, Illinois) was applied for the statistical analysis. Nonparametric methods were used to test data with an abnormal distribution.

Propensity score (PS) matching was performed with five variables (age, BMI, mode of surgery, the extent of resection, and combined resection) and a match tolerance of 0.02 percent. The receiver operator characteristic curve was used to find an optimal neutrophil count (NE) cut off value to correctly diagnosis anastomotic leakages. A chi-square test or Fisher's exact test was used to compare the differences between the two groups. Logistic regression was applied to identify the independent predictive factors for anastomotic leakage. A p-value of less than 0.05 was considered statistically significant.

## Results

PS matching generated 70 eligible cases (35 cases of anastomotic leakage and 35 cases of no anastomotic leak). There was no difference in the basic clinical parameters between the two groups (Table 1). The reoperation rate was significantly higher in patients with anastomotic leakage than in those without an anastomotic leakage. More hemorrhagic, infectious complications and impaired vital organ function were observed in patients who had an anastomotic failure than those without anastomotic leakage (Table 2). Four patients died of postoperative complications after developing an anastomotic leakage. The leading cause of death was severe abdominal infection followed by shock and cardiac and respiratory failure. There were no deaths in the group without anastomotic leakages.

The multivariate analysis of overall factors revealed that blood neutrophilia ( $NE \geq 85.8\%$ ) during postoperative day 1 to day 3 (POD 1-3), fever (body

temperature (T)  $\geq 38.5^{\circ}\text{C}$ ) during postoperative day 4 to day 7(POD 4–7) and suspicious findings on CT were independent predictive factors for an anastomotic leakage ( $p < 0.05$ , Table 3).

#### Postoperative CT parameters

In the univariate analysis, there was a significant association between anastomotic leakage and five CT variables, i.e. pneumoperitoneum, pneumoseroperitoneum (intra-abdominal accumulation of mixed gas and fluid), accumulation of extraluminal gas at the anastomosis site, seroperitoneum and extraluminal fluid collection at the anastomosis site ( $p < 0.05$ ). The multivariate analysis of the CT parameters revealed that the accumulation of extraluminal gas at the anastomosis site and seroperitoneum were independent diagnostic parameters of a postoperative anastomotic leakage ( $p < 0.05$ , Table 4). Typical images of accumulation of extraluminal gas at different types of anastomosis sites were visible in CT scan (Fig.1, 2, 3).

#### Discussion

PS matching is beneficial not only to standardize retrospective data as prospective data but also to facilitate a better comparison of clinical conditions with low occurrences. Many previous conventional studies have suggested that postoperative complications might be related to age, obesity, mode of surgery, and the extent of resection [7, 9, 10]. Therefore, we incorporated all these factors for PS matching.

We identified simple but useful elements with specific abnormal range

(body temperature, blood neutrophil count) that can detect anastomotic leakages and can be applied at any hospital with basic resources. These factors were very sensitive but with lower specificity, if interpreted alone. Therefore, a combination of three factors, i.e. body temperature, blood WBC, and CT findings, would increase the specificity for the diagnosis of anastomotic leakage. Many authors have advocated for barium swallow tests to diagnose suspicious cases of anastomotic leakages after gastrointestinal (GI) surgeries. However, the generalized use of this examination was debatable [17-19]. Few studies have suggested postoperative CT after gastric cancer surgery, and there were different opinions on the use of oral contrast agents [20-21]. We found that five CT variables (pneumoperitoneum, pneumoserosoperitoneum, extraluminal gas at the anastomosis site, seroperitoneum, and extraluminal fluid collection at the anastomosis site) were significantly correlated with an anastomotic leak. These variables were created to minimize the heterogeneity in observation. However, it was still difficult to diagnose an early anastomotic leakage by CT examination only, because approximately 21 percent of patients with intra-abdominal free gas had no anastomotic leakage. Therefore, the clinical presentation, such as consistent pyrexia and neutrophilia, still has an essential role in the detection of compromised patients.

#### Blood routine and fever

Elevated white blood cell (WBC) and neutrophil (NE) counts are well-known laboratory findings for inflammation after surgery. However, to the



best of our knowledge, no previous studies have focused on these simple parameters, probably due to these factors having a high sensitivity but low specificity for a particular type of complication, especially for low-incidence postoperative complications such as anastomotic leakages. Standardizing the timing of these findings was difficult in this retrospective analysis. We tried to overcome this challenge by creating a time range and noting which findings occurred the most during POD 1-3 and POD 4-7. Similarly, we did not find any previous studies that described whether the presence of fever was associated with a specific postoperative complication of gastric cancer surgery. To perform an objective calculation, we divided the patients' body temperatures into two categories (e.g.,  $T \geq 38$  and  $\geq 38.5^{\circ}\text{C}$ ) and recorded the presence of these two levels of body temperature in two different intervals of time, e.g., during POD 1-3 and POD 4-7. We found that a postoperative temperature  $\geq 38.5^{\circ}\text{C}$  was independently correlated with an anastomotic leak. However, these cut off values were set empirically. Nonetheless, the findings of this study are still beneficial for identifying the group of patients who are compromised by an anastomotic leakage.

## Conclusion

On CT examination, extraluminal gas at the anastomosis site is highly suggestive of anastomotic leakage. Postoperative CT examination is beneficial for the early detection of anastomotic leakage especially in patients with neutrophilia and fever.

## List of all abbreviations

CT: Computed Tomography

POD: Postoperative day

PS: Propensity score

NE: Neutrophilia

## References

1. Hu Y, Huang C, Sun Y, Su X, Cao H, Hu J, et al. Morbidity and Mortality of Laparoscopic Versus Open D2 Distal Gastrectomy for Advanced Gastric Cancer: A Randomized Controlled Trial. *J Clin Oncol*. 2016 Apr 20; 34(12):1350-7.
2. Sah BK, Zhu ZG, Chen MM, Xiang M, Chen J, Yan M, et al. Effect of surgical work volume on postoperative complication: superiority of specialized center in gastric cancer treatment. *Langenbecks Arch Surg*. 2009 Jan; 394(1):41-7.
3. Shi Y, Xu X, Zhao Y, Qian F, Tang B, Hao Y, et al. Short-term surgical outcomes of a randomized controlled trial comparing laparoscopic versus open gastrectomy with D2 lymph node dissection for advanced gastric cancer. *Surg Endosc*. 2018; 32 (5):2427-2433.
4. Tu RH, Lin JX, Zheng CH, Li P, Xie JW, Wang JB, et al. Complications and failure to rescue following laparoscopic or open gastrectomy for gastric cancer: a propensity-matched analysis. *Surg Endosc*. 2017; 31 (5):2325-2337.
5. Zizzo M, Ugoletti L, Manzini L, Castro Ruiz C, Nita GE, Zanelli M, et al. Management of duodenal stump fistula after gastrectomy for malignant disease: a systematic review of the literature. *BMC Surg*. 2019; 19(1):55.
6. Zakrison T, Nascimento BA Jr, Tremblay LN, Kiss A, Rizoli SB. Perioperative vasopressors are associated with an increased risk of

- gastrointestinal anastomotic leakage. World J Surg. 2007; 31(8):1627-34.
7. Ciesielski M, Kruszewski WJ, Walczak J, Szajewski M, Szefel J, Wydra J, et al. Analysis of postoperative morbidity and mortality following surgery for gastric cancer. Surgeon volume as the most significant prognostic factor. Prz Gastroenterol. 2017; 12(3):215-221.
8. Kikuchi H, Miyata H, Konno H, Kamiya K, Tomotaki A, Gotoh M, et al. Development and external validation of preoperative risk models for operative morbidities after total gastrectomy using a Japanese web-based nationwide registry. Gastric Cancer. 2017; 20(6):987-997.
9. Tu RH, Lin JX, Zheng CH, Li P, Xie JW, Wang JB, et al. Development of a nomogram for predicting the risk of anastomotic leakage after a gastrectomy for gastric cancer. EJSO 2017; 43: 485-492
10. Deguchi Y, Fukagawa T, Morita S, Ohashi M, Saka M, Katai H. Identification of Risk Factors for Esophagojejunal Anastomotic Leakage after Gastric Surgery. World J Surg 2012; 36:1617–1622
11. Kim SH, Son SY, Park YS, Ahn SH, Park DJ, Kim HH. Risk Factors for Anastomotic Leakage: A Retrospective Cohort Study in a Single Gastric Surgical Unit. J Gastric Cancer. 2015;15(3):167-75
12. Migita K, Takayama T, Matsumoto S, Wakatsuki K, Enomoto K, Tanaka T, et al. Risk Factors for Esophagojejunal Anastomotic Leakage After Elective Gastrectomy for Gastric Cancer. J Gastrointest Surg 2012; 16:1659–1665

13. Hu ZW, Wang XW, An XS, Li WJ, Feng Y, You ZB. The Diagnostic Value of Routine Contrast Esophagramin Anastomotic Leaks After Esophagectomy. *World J Surg* 2017; 41:2062–2067
14. Strauss C, Mal F, Perniceni T, Bouzar N, Lenoir St, Gayet B, et al. Computed Tomography Versus Water-Soluble Contrast Swallow in the Detection of Intrathoracic Anastomotic Leak Complicating Esophagogastrectomy (Ivor Lewis). *Ann Surg* 2010;251: 647–651
15. Aday U, Gündeş E, Çiyiltepe H, Çetin DA, Gülmez S, Senger AS, et al. Examination of anastomotic leak with aqueous contrast swallow after total gastrectomy: Should it be carried out routinely? *Contemp Oncol (Pozn)*. 2017; 21(3):224-227
16. Kim YE, Lim JS, Hyung WJ, Lee SK, Choi JY, Noh SH, et al. Clinical implication of positive oral contrast computed tomography for the evaluation of postoperative leakage after gastrectomy for gastric cancer. *J Comput Assist Tomogr*. 2010 Jul; 34(4):537-42.
17. Lamb PJ, Griffin SM, Chandrashekar MV, Richardson DL, Karat D, Hayes N.. Prospective study of routine contrast radiology after total gastrectomy. *Br J Surg*. 2004 Aug; 91(8):1015-9.
18. Igor J, Poluksht N, Siegelmann-Danieli N, Lavy R, Wassermann I, Halpern Z, et al. The role of upper gastrointestinal swallow study in patients undergoing proximal or total gastrectomy. *Isr Med Assoc J*. 2010 Sep; 12(9):560-2.

19. Tonouchi H, Mohri Y, Tanaka K, Ohi M, Kobayashi M, Yamakado K, et al.  
Diagnostic sensitivity of contrast swallow for leakage after gastric resection.  
World J Surg. 2007 Jan; 31(1):128-31.
20. Kim TH, Kim JH, Shin CI, Kim SH, Han JK, Choi BI. CT findings suggesting  
anastomotic leak and predicting the recovery period following gastric  
surgery. Eur Radiol. 2015 Jul; 25(7):1958-66.
21. Kim YE, Lim JS, Hyung WJ, Lee SK, Choi JY, Noh SH, et al. Clinical  
implication of positive oral contrast computed tomography for the  
evaluation of postoperative leakage after gastrectomy for gastric cancer. J  
Comput Assist Tomogr. 2010 Jul; 34(4):537-42.

Table 1 Demographic data of the PS-matched patients

| Parameter          |              | Without leakage | Leakage |
|--------------------|--------------|-----------------|---------|
| Sex                | Male         | 27              | 25      |
|                    | Female       | 8               | 10      |
| Age group (years)  | 41–50        | 2               | 2       |
|                    | 51–60        | 7               | 8       |
|                    | 61–70        | 11              | 9       |
|                    | 71–80        | 10              | 11      |
|                    | 81–90        | 5               | 5       |
| BMI                | <25          | 24              | 27      |
|                    | 25–<30       | 11              | 7       |
|                    | ≥30          | 0               | 1       |
| Mode of surgery    | Open         | 33              | 33      |
|                    | Laparoscopic | 2               | 2       |
| Type of resection  | Subtotal     | 19              | 19      |
|                    | Total        | 16              | 16      |
| Combined resection | No           | 28              | 29      |
|                    | Yes          | 7               | 6       |
| TNM Stage          | I            | 13              | 8       |
|                    | II           | 4               | 3       |
|                    | III          | 15              | 21      |

Table 2 Postoperative complications between the two groups

| Complication                         |                  | Number of patients |              | p-value |
|--------------------------------------|------------------|--------------------|--------------|---------|
|                                      |                  | Without leakage    | With leakage |         |
| Hemorrhage                           | Intra-abdominal  | 0                  | 6            | 0.025   |
|                                      | Anastomosis site | 0                  | 2            | NS      |
| Wound dehiscence                     |                  | 2                  | 6            | NS      |
| Multiple infections                  |                  | 2                  | 13           | 0.003   |
| Overall infection                    |                  | 17                 | 25           | 0.051   |
| Impaired renal function              |                  | 4                  | 14           | 0.006   |
| Cardiac/respiratory failure          |                  | 2                  | 10           | 0.023   |
| Overall gastrointestinal obstruction |                  | 8                  | 13           | NS      |
| Pancreatic fistula                   |                  | 1                  | 0            | NS      |
| Readmission                          |                  | 1                  | 3            | NS      |
| Reoperation                          |                  | 2                  | 10           | 0.023   |
| Death                                |                  | 0                  | 4            | NS      |



Table 3 Multivariate analysis of overall factors

| Variable   |            | Odds ratio | 95% CI      | p-value |
|------------|------------|------------|-------------|---------|
| NE POD 1-3 | <85.8%     | 1          |             |         |
|            | ≥85.8%     | 12.14      | 2.04–72.01  | 0.006   |
| T POD 4–7  | <38.5°C    | 1          |             |         |
|            | ≥38.5°C    | 18.85      | 2.22–159.89 | 0.007   |
| CT         | Normal     | 1          |             |         |
|            | Suspicious | 49.55      | 7.71–318.27 | 0.000   |

T: Body temperature, POD: Postoperative day at the hospital, NE: Blood neutrophil

Table 4 Multivariate analysis of the CT findings

| Variable             |         | Odds ratio | 95% CI     | p-value |
|----------------------|---------|------------|------------|---------|
| Anastomosis site gas | Absent  | 1          |            |         |
|                      | Present | 5.88       | 1.84–18.83 | 0.003   |
| Seroperitoneum       | Absent  | 1          |            |         |
|                      | Present | 4.88       | 1.15–20.70 | 0.031   |

Fig. 1 Extraluminal gas at gastroduodenal anastomosis

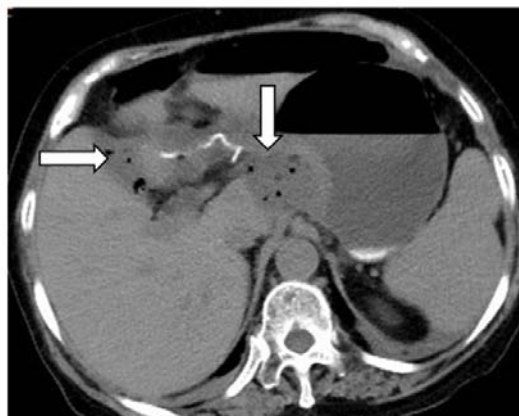

Fig. 2 Extraluminal gas at duodenal stump

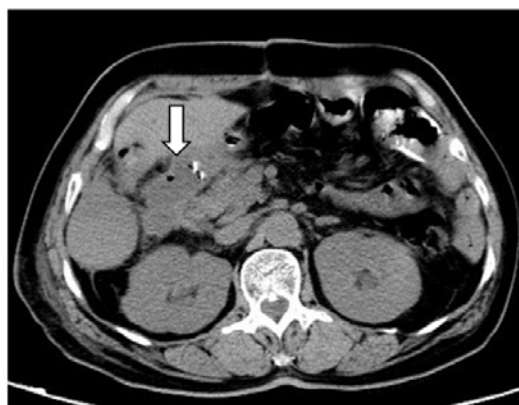

Fig. 3 Extraluminal gas at esophagojejunal anastomosis

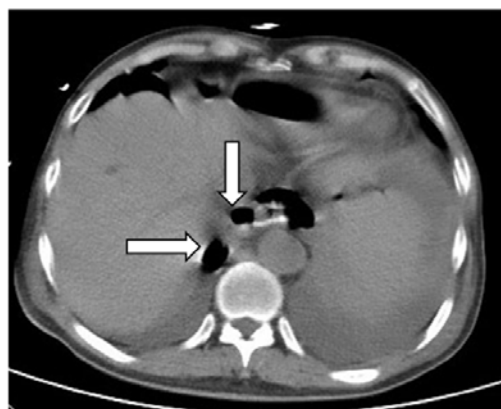

Source: https://www.medrxiv.org/content/10.1101/2020.04.25.20080093v5.full.pdf
